# Supplementary material for: The Strawberry Line’s Breeding Birds and their Biophilic Benefits (Vale of Winscombe Section)
Source: Preprints.org preprint supplement (doi:10.20944/preprints202009.0303.v1), 2020-09-13
Supplement: Supplementary file 1 [file supplementary]

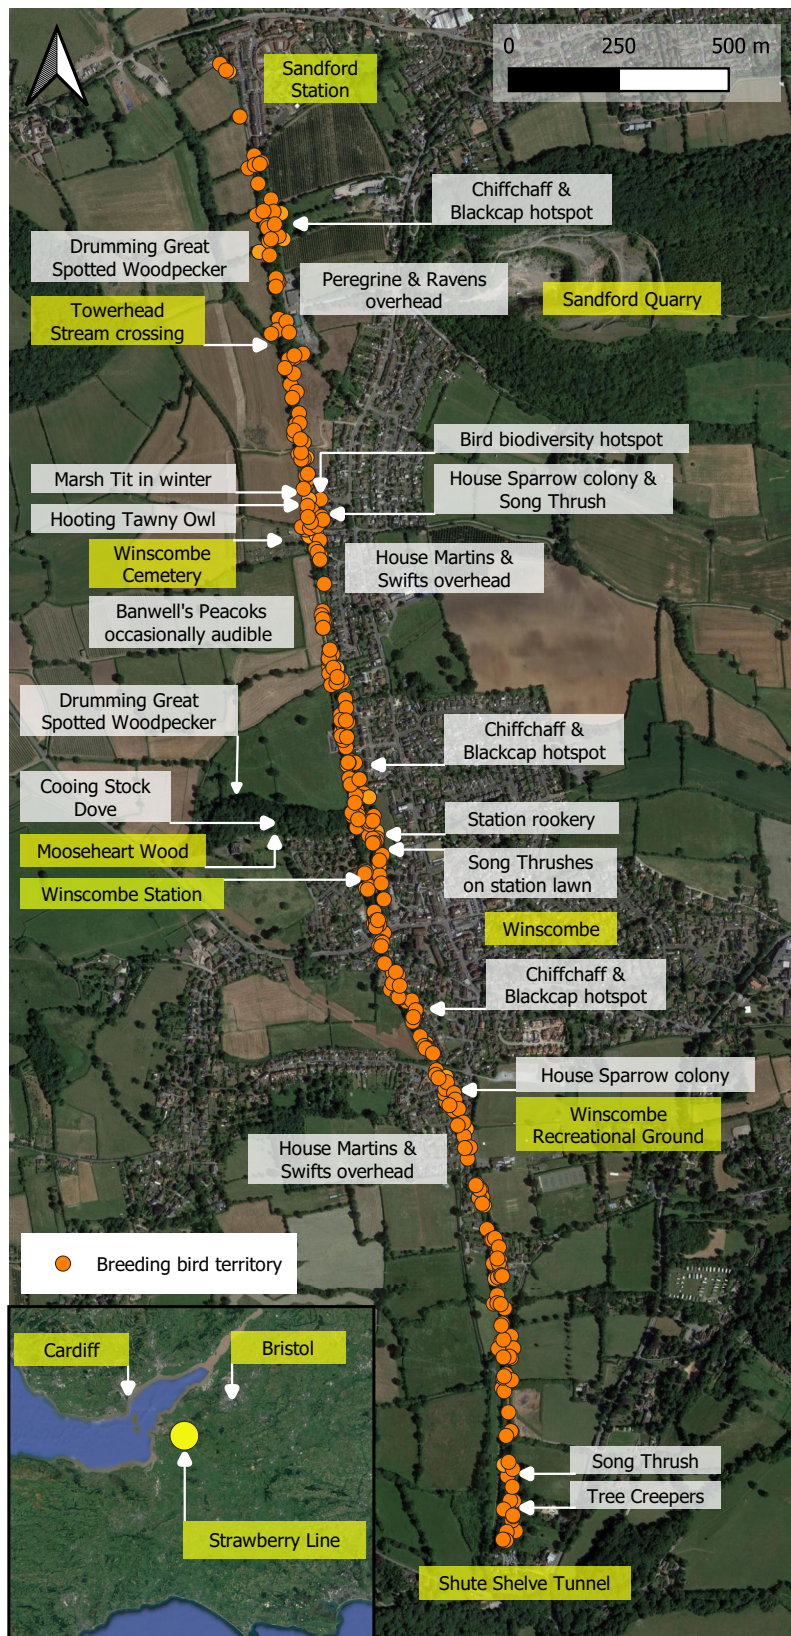

Figure 1 (left) Distribution of breeding bird territories along the Strawberry Line

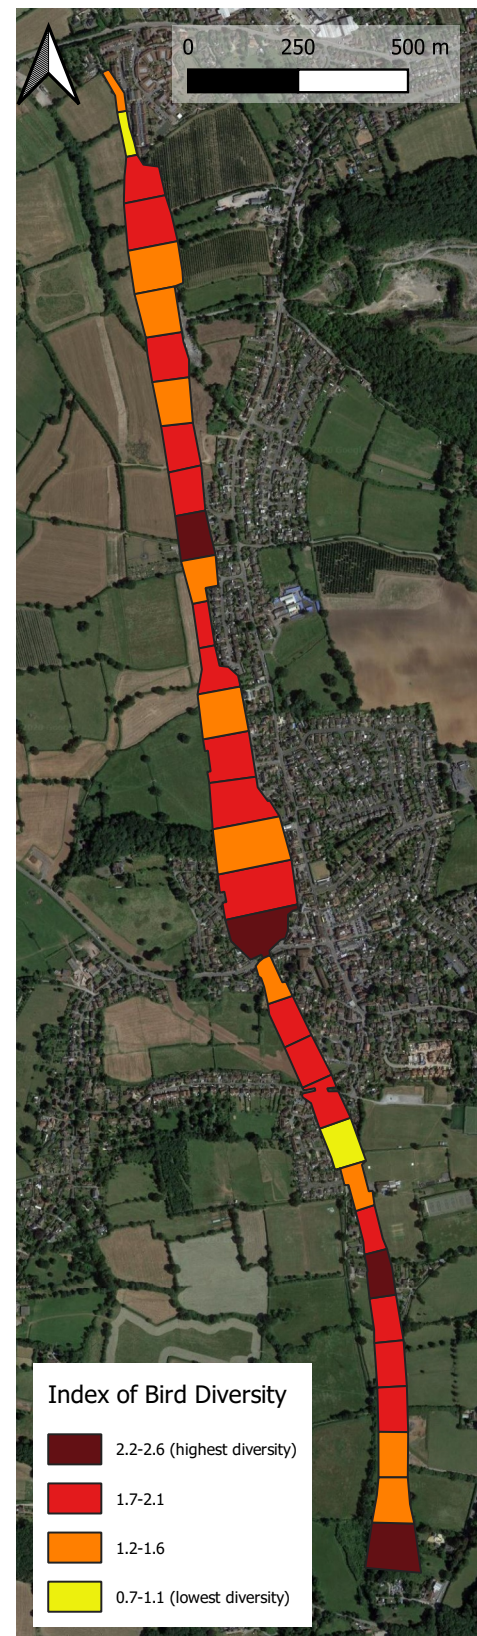

Figure 2 (right) Variation in breeding bird diversity along the Strawberry Line as measured by the Shannon-Weiner Diversity Index (N.B. the width of the Strawberry Line has been exaggerated [increased c. three-fold] for clarity)
